# Supplementary material for: The endometrial microbiota of women with or without a live birth within 12 months after a first failed IVF/ICSI cycle
Source: PubMed Central journal article supplement (PMC9977966; doi:10.1038/s41598-023-30591-2), 2023-03-01

## Supplement 1

**Title:** The endometrial microbiota of women with or without a live birth within 12 months after a first failed IVF/ICSI cycle

**Authors:** Bich Ngoc Bui; Nienke van Hoogenhuijze; Marco Viveen; Femke Mol; Gijs Teklenburg; Jan-Peter de Bruin; Dagmar Besselink; Linda Stevens Brentjens; Shari Mackens; Malbert R.C. Rogers; Gaby Steba; Frank Broekmans; Fernanda L. Paganelli; Janneke H.H.M. van de Wijgert

### Supplementary Methods

#### *Total DNA isolation*

One-third of the snap-frozen endometrial tissue of each participant was thawed. Half of it was used for the microbiota analysis described in this study. Stainless steel beads ( $\emptyset$  5 mm, Qiagen, Germany) and 50  $\mu$ l nuclease-free water were added to the tissue, after which the tissue was homogenized using the TissueLyser II system (Qiagen, Germany). To each sample, 800  $\mu$ l RLT Plus lysis buffer with  $\beta$ -mercaptoethanol was added, followed by overnight incubation, while shaking at 60°C. Subsequently, 500  $\mu$ l zirconium 0.1 mm beads were added and beat beating was applied 2 times at 3.5 m/s for 2 min (Mini-Beadbeater-96, Biospec products), followed by 2 min incubation on ice interval. Total DNA was extracted using the Qiagen Allprep DNA/RNA Mini Kit following the manufacturer's protocol. Two different positive control mock communities (ZymoBIOMICS Microbial Community Standard (D6300) and Standard II (Log Distribution) (D6310)) as well as negative DNA extraction controls (Microbial DNA-free water (Qiagen art nr. 338132)) were included in all steps of the analysis. No template controls (NTC) (Microbial DNA-free water (Qiagen art nr. 338132)) were included in the PCR steps.

#### *16S rRNA sequencing and bioinformatics*

16S rRNA sequencing was done according to Fadrosch et al. (1) but primers were modified to target and amplify the V1-V2 region of the 16S rRNA gene: forward primer 5' – AGM GTT YGA

TYM TGG CTC AG – 3' and reverse primer 5' – GCT GCC TCC CGT AGG AGT – 3' (2,3). The V1-V2 region was chosen to minimise human DNA amplification (4). Sequencing was performed on a MiSeq platform (Illumina, USA), using the MiSeq Reagent Kit v3 (Illumina, USA). The QIIME2 microbial community analysis pipeline (version 2018.8) (5) was used with DADA2 (6) for amplicon sequence variant detection, and SILVA as the 16S rRNA reference gene database (SILVA 138) (7). Reads classified as human DNA, mitochondria or 'unassigned' were removed. All data from samples with fewer than 100 bacterial reads were discarded.

## Supplementary Results

### *Sequencing results positive and negative controls*

The positive mock community controls (n=9) had a total of 728,660 bacterial reads with a median of 98,329 reads per sample (IQR 52,347 – 112,266). The relative abundances of the Standard Mock Community (D6300) was as expected, with approximately equal distribution of 8 bacterial taxa (**Figure S1**). In addition, a log distribution with a detection limit of 0.089% was observed in the Standard Mock Community II (D6310) (**Figure S1**). The theoretical microbial composition of the standards can be found in the Zymo Research Instruction Manuals of the corresponding standards (see (8) for D6300 and (9) for D6310). The negative controls (n=8) had a total of 157 bacterial reads with a median of 0 reads per sample (IQR 0 – 5). The no template controls (NTC) (n=24) had a total of 378 reads with a median of 2 reads per sample (IQR 0 – 18). One negative control had 146 reads, however, showing high abundance of *Occallatibacter* and *Meiothermus* (**Table S1**). *Occallatibacter* was not present in the study samples, whereas *Meiothermus* was only present in three study samples with very low reads (<10). All other negative controls (n=7) and all NTC (n=24) contained fewer than 100 reads (**Table S1**).

## References

1. Fadrosch DW, Ma B, Gajer P, Sengamalay N, Ott S, Brotman RM, et al. An improved dual-indexing approach for multiplexed 16S rRNA gene sequencing on the Illumina MiSeq platform. *Microbiome*. 2014;2(1):1–7.
2. Browne HP, Forster SC, Anonye BO, Kumar N, Neville BA, Stares MD, et al. Culturing of “unculturable” human microbiota reveals novel taxa and extensive sporulation. *Nature*. 2016;533(7604):543–6.
3. Elliott DRF, Walker AW, O’Donovan M, Parkhill J, Fitzgerald RC. A non-endoscopic device to sample the oesophageal microbiota: a case-control study. *Lancet Gastroenterol Hepatol* [Internet]. 2017;2(1):32–42. Available from: [http://dx.doi.org/10.1016/S2468-1253\(16\)30086-3](http://dx.doi.org/10.1016/S2468-1253(16)30086-3)
4. Walker SP, Barrett M, Hogan G, Flores Bueso Y, Claesson MJ, Tangney M. Non-specific amplification of human DNA is a major challenge for 16S rRNA gene sequence analysis. *Sci Rep* [Internet]. 2020;10(1):1–7. Available from: <https://doi.org/10.1038/s41598-020-73403-7>
5. Bolyen E, Rideout JR, Dillon MR, Bokulich NA, Abnet CC, Al-Ghalith GA, et al. Reproducible, interactive, scalable and extensible microbiome data science using QIIME 2. *Nat Biotechnol*. 2019;37(8):852–7.
6. Callahan BJ, McMurdie PJ, Rosen MJ, Han AW, Johnson AJA, Holmes SP. DADA2: High-resolution sample inference from Illumina amplicon data. *Nat Methods*. 2016;13(7):581–3.
7. Quast C, Pruesse E, Yilmaz P, Gerken J, Schweer T, Yarza P, et al. The SILVA ribosomal RNA gene database project: Improved data processing and web-based tools. *Nucleic Acids Res*. 2013;41(D1):590–6.
8. ZymoResearch. Instruction Manual: ZymoBIOMICS™ Microbial Community Standard D6300 [Internet]. Available from: [https://files.zymoresearch.com/protocols/\\_d6300\\_zymbiomics\\_microbial\\_community\\_standard.pdf](https://files.zymoresearch.com/protocols/_d6300_zymbiomics_microbial_community_standard.pdf)
9. ZymoResearch. Instruction Manual: ZymoBIOMICS™ Microbial Community Standard II (Log Distribution) D6310 [Internet]. Available from: [https://files.zymoresearch.com/protocols/\\_d6310\\_zymbiomics\\_microbial\\_community\\_standard\\_ii\\_\(log\\_distribution\).pdf](https://files.zymoresearch.com/protocols/_d6310_zymbiomics_microbial_community_standard_ii_(log_distribution).pdf)

## Supplementary Tables and Figures

**Figure S1: Positive controls.** Relative abundances of bacterial taxa in the mock communities that were used as positive controls in this study. In the left panel, the average distribution of 8 bacterial taxa in the ZymoBIOMICS Microbial Community Standard II (Log Distribution) (D6310) (n=4) is displayed and in the right panel the average distribution of 8 bacterial taxa in the ZymoBIOMICS Microbial Community Standard (D6300) (n=4 samples). See **Table S1** for sequencing results of the negative control samples.

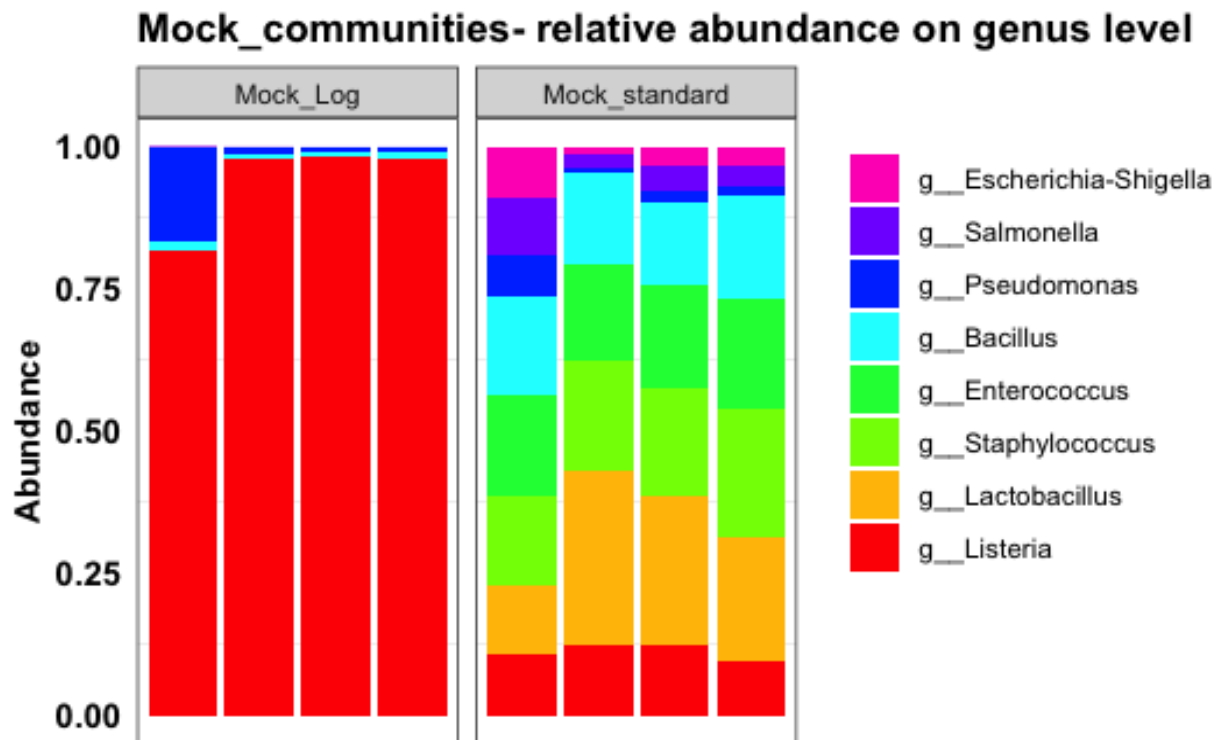



**Figure S2: Heatmap of all included samples.** Heatmap of the 20 most relatively abundant bacterial genera in all 92 endometrium samples with  $\geq 100$  bacterial reads that were included in the analysis. The heatmap was generated with the phyloseq and microbiome packages in R studio (v4.1.0).

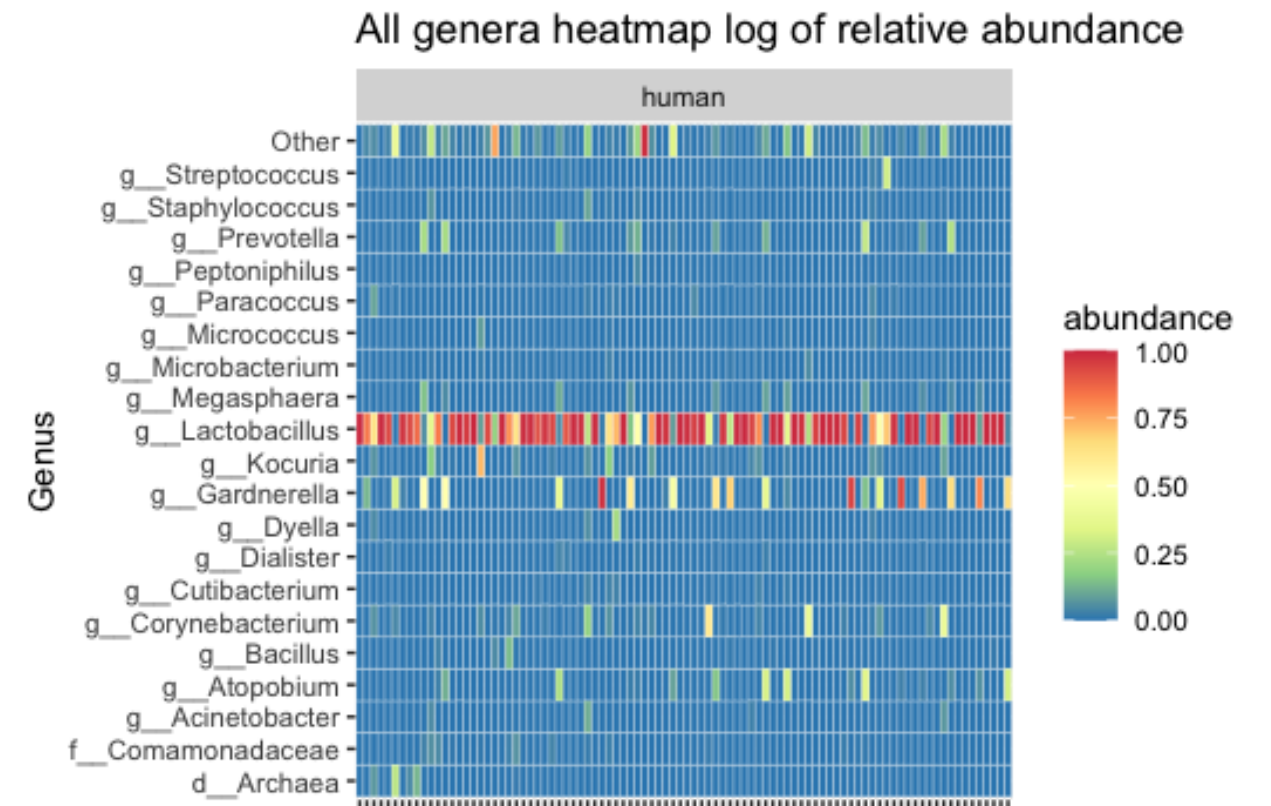

**Figure S3: Endometrial microbiota compositions by birth outcomes.** Comparison of endometrial microbiota composition and diversity between the live birth (LB), no live birth (NLB), no pregnancy (NP) and pregnancy loss (PL) groups. **a,c.** Graphical visualisation of alpha diversity analysis of LB vs NLB (**a**) and NP vs PL (**c**). Boxplots represent median alpha diversity by Chao1 index and Inverse Simpson index with interquartile range. **b,d.** Graphical visualisation of beta diversity analysis by principal component analysis (PCA) of LB vs NLB (**b**) and NP vs PL (**d**), based on centered log-ratio (clr) transformation of the relative abundances of genera. **e,f.** Heatmaps representing the 20 most relatively abundant bacterial genera in endometrial samples of LB vs NLB (**e**), and NP vs PL (**f**). Each column represents a subject, whereas each row represents a genus. The heatmaps were generated with the phyloseq and microbiome packages in R studio (v4.1.0).

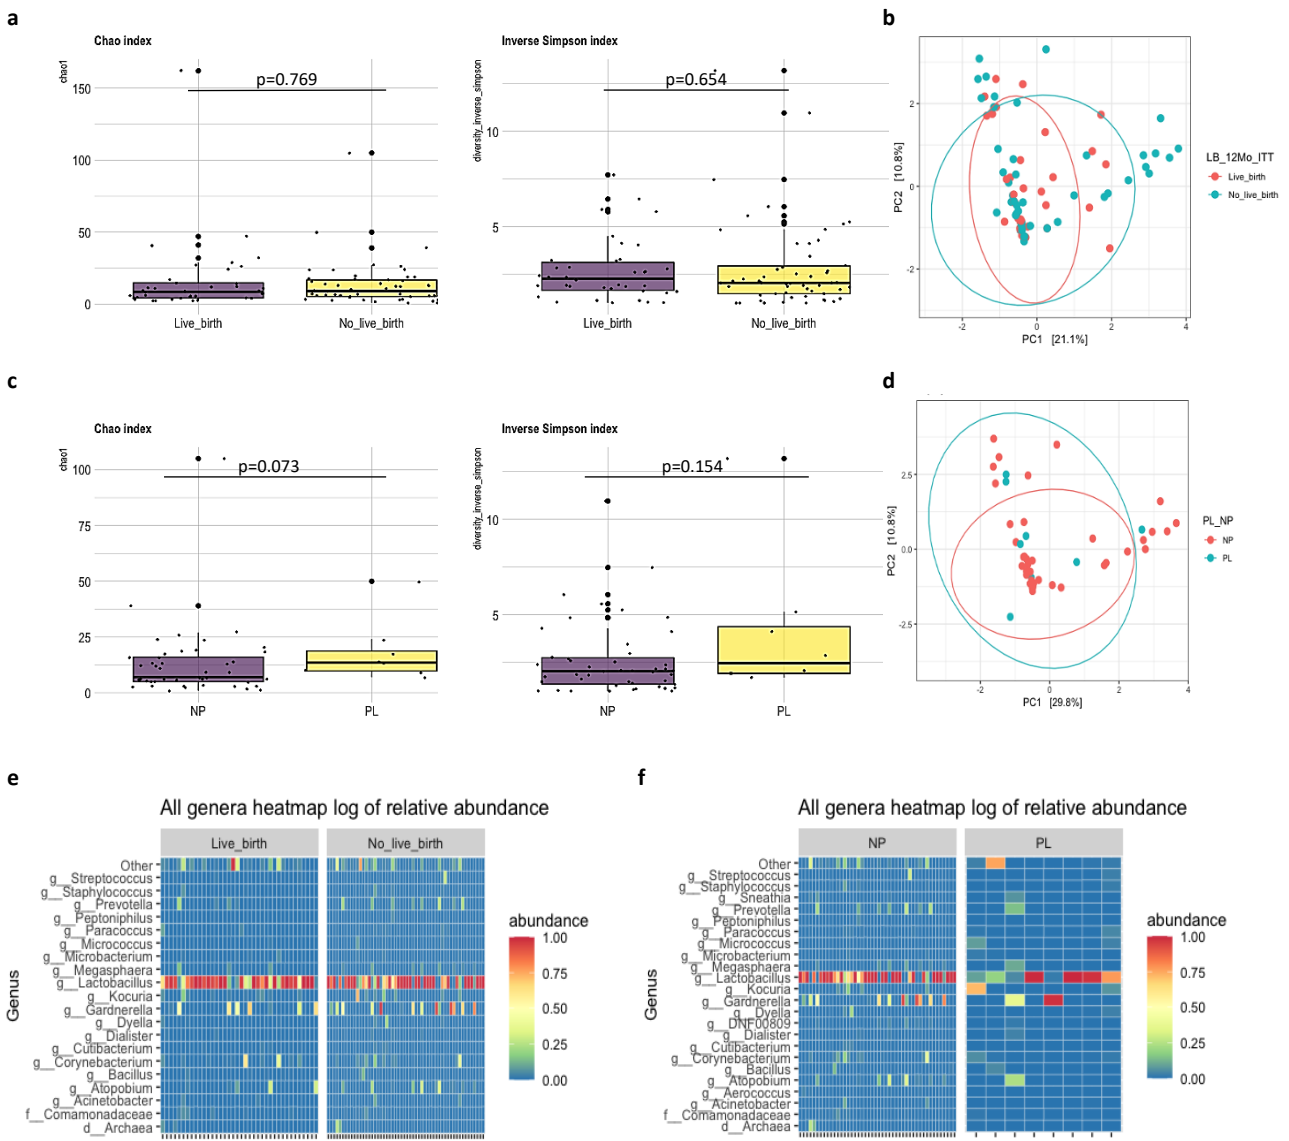





| <b>Table S2. Endometrial microbiota characteristics by birth outcome<sup>a</sup>. For additional characteristics, see Table 3 in the main manuscript</b> |                      |                       |                               |                 |                                     |                                |
|----------------------------------------------------------------------------------------------------------------------------------------------------------|----------------------|-----------------------|-------------------------------|-----------------|-------------------------------------|--------------------------------|
|                                                                                                                                                          | <b>LB<br/>(n=38)</b> | <b>All NLB (n=54)</b> | <b>NLB<sup>b</sup> (n=54)</b> |                 | <b>p LB vs. all NLB<sup>c</sup></b> | <b>p NP vs. PL<sup>c</sup></b> |
|                                                                                                                                                          |                      |                       | <b>NP (n=46)</b>              | <b>PL (n=8)</b> |                                     |                                |
| <i>Lactobacillus</i> genus RA, n (%)                                                                                                                     |                      |                       |                               |                 | 0.273                               | 0.542                          |
| ≤10%                                                                                                                                                     | 4 (10.5)             | 13 (24.1)             | 10 (21.7)                     | 3 (37.5)        |                                     |                                |
| 11-89%                                                                                                                                                   | 10 (26.3)            | 13 (24.1)             | 11 (23.9)                     | 2 (25.0)        |                                     |                                |
| ≥90%                                                                                                                                                     | 24 (63.2)            | 28 (51.9)             | 25 (54.3)                     | 3 (37.5)        |                                     |                                |
| <i>L. iners</i> RA, n (%)                                                                                                                                |                      |                       |                               |                 | 0.782                               | 0.858                          |
| ≤10%                                                                                                                                                     | 26 (68.4)            | 33 (61.1)             | 27 (58.7)                     | 6 (75.0)        |                                     |                                |
| 11-89%                                                                                                                                                   | 8 (21.2)             | 13 (24.1)             | 12 (26.1)                     | 1 (12.5)        |                                     |                                |
| ≥90%                                                                                                                                                     | 4 (10.5)             | 8 (14.8)              | 7 (15.2)                      | 1 (12.5)        |                                     |                                |
| Other lactobacilli RA, n (%)                                                                                                                             |                      |                       |                               |                 | 0.838                               | 0.738                          |
| ≤10%                                                                                                                                                     | 30 (78.9)            | 45 (83.3)             | 37 (80.4)                     | 8 (100)         |                                     |                                |
| 11-89%                                                                                                                                                   | 6 (11.1)             | 6 (11.1)              | 6 (13.0)                      | 0               |                                     |                                |
| ≥90%                                                                                                                                                     | 2 (5.3)              | 3 (5.6)               | 3 (6.5)                       | 0               |                                     |                                |
| >10% <i>Gardnerella</i> genus RA, n (%)                                                                                                                  | 6 (15.8)             | 13 (24.1)             | 11 (23.9)                     | 2 (25.0)        | 0.436                               | 1.000                          |
| >10% Other BV-anaerobes RA, n (%)                                                                                                                        | 5 (13.2)             | 9 (16.7)              | 8 (17.4)                      | 1 (12.5)        | 0.772                               | 1.000                          |
| >10% Other bacteria RA, n (%) <sup>d</sup>                                                                                                               | 11 (28.9)            | 13 (24.1)             | 10 (21.7)                     | 3 (37.5)        | 0.636                               | 0.382                          |
| >10% BV-anaerobes or other bacteria RA, n (%)                                                                                                            | 13 (34.2)            | 21 (38.9)             | 17 (37.0)                     | 4 (50.0)        | 0.668                               | 0.697                          |

BV, bacterial vaginosis; LB, live birth; NLB, no live birth; NP, no pregnancy; PL, pregnancy loss; RA, relative abundance.  
<sup>a</sup>Only samples with ≥100 16S rRNA sequencing reads (V1-V2 region) were included.  
<sup>b</sup>The NLB participants included participants with a pregnancy loss (PL) as well as participants who did not get pregnant at all (NP).  
<sup>c</sup>Statistical analysis was performed using the Fisher's exact test.  
<sup>d</sup>The group of "other bacteria" contains skin bacteria, unresolved bacteria and minority taxa that could not be assigned to any of the other categories.

**Table S3. Participant characteristics by infertility causes<sup>a</sup>**

|                                                           | <b>Male factor<br/>(n=46)</b> | <b>Unexplained<br/>infertility<br/>(n=38)</b> | <b>Other infertility<sup>b</sup><br/>(n=8)</b> | <b>p male factor<br/>vs.<br/>unexplained<sup>c</sup></b> | <b>p male factor<br/>vs. unexplained<br/>+ other<sup>c</sup></b> | <b>p unexplained<br/>vs. male factor<br/>+ other<sup>c</sup></b> |
|-----------------------------------------------------------|-------------------------------|-----------------------------------------------|------------------------------------------------|----------------------------------------------------------|------------------------------------------------------------------|------------------------------------------------------------------|
| Median female age in years (IQR)                          | 32.7 (28.9-36.2)              | 37.7 (33.9-40.6)                              | 37.7 (30.6-40.6)                               | <b>&lt;0.001</b>                                         | <b>&lt;0.001</b>                                                 | <b>0.001</b>                                                     |
| Median female BMI in kg/m <sup>2</sup> (IQR) <sup>d</sup> | 23.0 (21.5-25.8)              | 23.8 (21.9-25.3)                              | 24.4 (22.0-27.8)                               | 0.625                                                    | 0.439                                                            | 0.831                                                            |
| Median infertility duration in mo (IQR)                   | 27.5 (21.0-36.0)              | 35.0 (24.8-51.0)                              | 37.0 (18.0-71.8)                               | <b>0.019</b>                                             | <b>0.026</b>                                                     | <b>0.034</b>                                                     |
| Female smokers, n (%)                                     | 6 (13.0)                      | 2 (5.3)                                       | 0                                              | 0.284                                                    | 0.267                                                            | 0.463                                                            |
| Type of infertility of the female, n (%) <sup>e</sup>     |                               |                                               |                                                | 0.187                                                    | 0.141                                                            | 0.393                                                            |
| Primary                                                   | 30 (65.2)                     | 19 (50.0)                                     | 3 (37.5)                                       |                                                          |                                                                  |                                                                  |
| Secondary                                                 | 16 (37.2)                     | 19 (50.0)                                     | 5 (62.5)                                       |                                                          |                                                                  |                                                                  |
| Median # previous embryo transfers per participant (IQR)  | 1.5 (1.0-3.3)                 | 2.0 (1.0-3.0)                                 | 2.0 (1.0-3.0)                                  | 0.885                                                    | 0.957                                                            | 0.816                                                            |
| Pregnancy outcome during follow-up                        |                               |                                               |                                                | 0.511                                                    | 0.290                                                            | 0.832                                                            |
| Live birth                                                | 22 (47.8)                     | 15 (39.5)                                     | 1 (12.5)                                       |                                                          |                                                                  |                                                                  |
| No live birth                                             | 24 (52.2)                     | 23 (60.5)                                     | 7 (87.5)                                       |                                                          |                                                                  |                                                                  |
| No pregnancy                                              | 22 (91.7)                     | 17 (73.9)                                     | 7 (100)                                        |                                                          |                                                                  |                                                                  |
| Pregnancy loss                                            | 2 (8.3)                       | 6 (26.1)                                      | 0                                              |                                                          |                                                                  |                                                                  |

BMI, body mass index; IQR, interquartile range.

<sup>a</sup>Only samples with  $\geq 100$  16S rRNA sequencing reads (V1-V2 region) were included.

<sup>b</sup>Other causes of infertility are tubal factor (n=1), ovulatory disorder (n=3), endometriosis (n=1) and mixed causes (n=3).

<sup>c</sup>Continuous variables were compared by Wilcoxon rank sum test and categorical variables by Fisher's exact test.

<sup>d</sup>Data was missing for one participant in the male factor infertility group.

<sup>e</sup>Primary: female has never conceived before. Secondary: female has conceived before.

**Table S4. Endometrial microbiota characteristics by infertility causes<sup>a</sup>**

|                                             | <b>Male factor<br/>(n=46)</b> | <b>Unexplained<br/>infertility<br/>(n=38)</b> | <b>Other infertility<sup>b</sup><br/>(n=8)</b> | <b>p male factor<br/>vs.<br/>unexplained<sup>c</sup></b> | <b>p male factor<br/>vs. unexplained<br/>+ other<sup>c</sup></b> | <b>p unexplained<br/>vs. male factor<br/>+ other<sup>c</sup></b> |
|---------------------------------------------|-------------------------------|-----------------------------------------------|------------------------------------------------|----------------------------------------------------------|------------------------------------------------------------------|------------------------------------------------------------------|
| Alpha diversity                             |                               |                                               |                                                |                                                          |                                                                  |                                                                  |
| Mean inverse Simpson diversity (SD)         | 2.68 (1.66)                   | 2.73 (2.22)                                   | 3.45 (3.35)                                    | 0.819                                                    | 0.891                                                            | 0.803                                                            |
| Mean Chao1 diversity (SD)                   | 14.22 (17.52)                 | 15.63 (26.30)                                 | 10.50 (6.78)                                   | 0.846                                                    | 0.891                                                            | 0.852                                                            |
| Untargeted ANCOM-BC results <sup>c, d</sup> | ---                           | ---                                           | ---                                            | ---                                                      | ---                                                              | ---                                                              |
| Targeted bacterial groups <sup>c, e</sup>   |                               |                                               |                                                |                                                          |                                                                  |                                                                  |
| <i>Lactobacillus</i> genus                  |                               |                                               |                                                | 0.634                                                    | 0.537                                                            | 0.733                                                            |
| Median RA (IQR)                             | 93.5 (54.1-98.5)              | 96.9 (18.9-99.7)                              | 96.5 (64.4-99.8)                               |                                                          |                                                                  |                                                                  |
| 95% CI                                      |                               |                                               |                                                |                                                          |                                                                  |                                                                  |
| Mean RA (SD)                                | 71.7 (36.6)                   | 65.4 (42.3)                                   | 74.5 (39.3)                                    |                                                          |                                                                  |                                                                  |
| 95% CI                                      | 60.8-82.5                     | 51.4-79.3                                     | 41.7-100                                       |                                                          |                                                                  |                                                                  |
| <i>L. crispatus</i>                         |                               |                                               |                                                | 0.910                                                    | 0.688                                                            | 0.871                                                            |
| Median RA (IQR)                             | 0 (0-78.0)                    | 0 (0-98.9)                                    | 0 (0-23.6)                                     |                                                          |                                                                  |                                                                  |
| 95% CI                                      | 0-57.2                        | 0-65.8                                        | 0-98.6                                         |                                                          |                                                                  |                                                                  |
| Mean RA (SD)                                | 35.6 (41.7)                   | 33.8 (46.4)                                   | 24.1 (44.7)                                    |                                                          |                                                                  |                                                                  |
| 95% CI                                      | 23.2-48.0                     | 18.5-49.0                                     | 0-61.5                                         |                                                          |                                                                  |                                                                  |
| <i>L. iners</i>                             |                               |                                               |                                                | 0.758                                                    | 0.869                                                            | 0.702                                                            |
| Median RA (IQR)                             | 0 (0-40.1)                    | 0 (0-31.6)                                    | 10.8 (0-70.7)                                  |                                                          |                                                                  |                                                                  |
| 95% CI                                      | 0-15.0                        | 0-5.5                                         | 0-92.1                                         |                                                          |                                                                  |                                                                  |
| Mean RA (SD)                                | 24.3 (36.6)                   | 22.9 (37.8)                                   | 32.9 (40.7)                                    |                                                          |                                                                  |                                                                  |
| 95% CI                                      | 13.5-35.2                     | 10.5-35.4                                     | 0-66.9                                         |                                                          |                                                                  |                                                                  |
| Other lactobacilli                          |                               |                                               |                                                | 0.951                                                    | 0.674                                                            | 0.795                                                            |
| Median RA (IQR)                             | 0 (0-3.2)                     | 0.1 (0-2.7)                                   | 6.3 (0-12.1)                                   |                                                          |                                                                  |                                                                  |
| 95% CI                                      | 0-1.4                         | 0-1.5                                         | 0-99.8                                         |                                                          |                                                                  |                                                                  |
| Mean RA (SD)                                | 11.7 (27.8)                   | 8.6 (21.9)                                    | 17.5 (33.8)                                    |                                                          |                                                                  |                                                                  |
| 95% CI                                      | 3.5-20.0                      | 1.4-15.8                                      | 0-45.8                                         |                                                          |                                                                  |                                                                  |
| <i>Gardnerella</i> genus                    |                               |                                               |                                                | 0.529                                                    | 0.762                                                            | 0.386                                                            |
| Median RA (IQR)                             | 0 (0-0)                       | 0 (0-26.5)                                    | 0 (0-0)                                        |                                                          |                                                                  |                                                                  |
| 95% CI                                      | 0-0                           | 0-0                                           | 0-31.3                                         |                                                          |                                                                  |                                                                  |
| Mean RA (SD)                                | 8.7 (21.3)                    | 17.1 (31.3)                                   | 3.9 (11.0)                                     |                                                          |                                                                  |                                                                  |
| 95% CI                                      | 2.3-15.0                      | 6.9-27.4                                      | 0-13.1                                         |                                                          |                                                                  |                                                                  |
| Other BV-anaerobes                          |                               |                                               |                                                | 0.377                                                    | 0.595                                                            | 0.258                                                            |
| Median RA (IQR)                             | 0 (0-1.9)                     | 0.1 (0-1.9)                                   | 0 (0-1.5)                                      |                                                          |                                                                  |                                                                  |

|                                               |              |             |                |       |              |       |
|-----------------------------------------------|--------------|-------------|----------------|-------|--------------|-------|
| 95% CI                                        | 0-0.2        | 0-0.9       | 0-20.3         |       |              |       |
| Mean RA (SD)                                  | 7.3 (17.8)   | 6.7 (15.2)  | 3.3 (7.2)      |       |              |       |
| 95% CI                                        | 2.0-12.6     | 1.7-11.7    | 0-9.3          |       |              |       |
| Other bacteria (IQR) <sup>f</sup>             |              |             |                | 0.470 | 0.660        | 0.372 |
| Median RA (IQR)                               | 1.8 (0-10.2) | 0.7 (0-6.4) | 3.5 (0.2-24.6) |       |              |       |
| 95% CI                                        | 0.3-6.3      | 0.1-3.9     | 0-73.7         |       |              |       |
| Mean RA (SD)                                  | 12.4 (22.6)  | 10.8 (23.1) | 18.2 (27.8)    |       |              |       |
| 95% CI                                        | 5.7-19.1     | 3.2-18.4    | 0-41.5         |       |              |       |
| RA subgroups of bacterial groups              |              |             |                |       |              |       |
| <i>Lactobacillus</i> genus RA, n (%)          |              |             |                | 0.576 | 0.606        | 0.549 |
| ≤10%                                          | 7 (15.2)     | 9 (23.7)    | 1 (12.5)       |       |              |       |
| 11-89%                                        | 13 (28.3)    | 8 (21.1)    | 2 (25.0)       |       |              |       |
| ≥90%                                          | 26 (56.5)    | 21 (55.3)   | 5 (62.5)       |       |              |       |
| <i>L. crispatus</i> RA, n (%)                 |              |             |                | 0.061 | <b>0.030</b> | 0.115 |
| ≤10%                                          | 24 (52.2)    | 24 (63.2)   | 6 (75.0)       |       |              |       |
| 11-89%                                        | 11 (23.9)    | 2 (5.3)     | 0              |       |              |       |
| ≥90%                                          | 11 (23.9)    | 12 (31.6)   | 2 (25.0)       |       |              |       |
| <i>L. iners</i> RA, n (%)                     |              |             |                | 0.897 | 1.000        | 0.669 |
| ≤10%                                          | 29 (63.0)    | 26 (68.4)   | 4 (50.0)       |       |              |       |
| 11-89%                                        | 11 (23.9)    | 7 (18.4)    | 3 (37.5)       |       |              |       |
| ≥90%                                          | 6 (13.0)     | 5 (13.2)    | 1 (12.5)       |       |              |       |
| Other lactobacilli RA, n (%)                  |              |             |                | 0.811 | 0.845        | 0.708 |
| ≤10%                                          | 38 (82.6)    | 32 (84.2)   | 5 (62.5)       |       |              |       |
| 11-89%                                        | 5 (10.9)     | 5 (13.2)    | 2 (25.0)       |       |              |       |
| ≥90%                                          | 3 (6.5)      | 1 (2.6)     | 1 (12.5)       |       |              |       |
| >10% <i>Gardnerella</i> genus RA, n (%)       | 8 (17.4)     | 10 (26.3)   | 1 (12.5)       | 0.424 | 0.607        | 0.302 |
| >10% Other BV-anaerobes RA, n (%)             | 7 (15.2)     | 6 (15.8)    | 1 (12.5)       | 1.000 | 1.000        | 1.000 |
| >10% Other bacteria RA, n (%) <sup>c</sup>    | 12 (26.1)    | 9 (23.7)    | 3 (37.5)       | 1.000 | 1.000        | 0.810 |
| >10% BV-anaerobes or other bacteria RA, n (%) | 18 (39.1)    | 13 (34.2)   | 3 (37.5)       | 0.658 | 0.829        | 0.668 |

BV, bacterial vaginosis; CI, confidence interval; IQR, interquartile range; NS, not significant; RA, relative abundance; SD, standard deviation.

<sup>a</sup>Only samples with ≥100 16S rRNA sequencing reads (V1-V2 region) were included.

<sup>b</sup>Other causes of infertility are tubal factor (n=1), ovulatory disorder (n=3), endometriosis (n=1) and mixed causes (n=3).

<sup>c</sup>ANCOM-BC analyses were corrected for multiple testing and were used to identify individual taxa with significantly different RAs in comparison groups in an untargeted manner. In the targeted analyses (using prespecified bacterial groups and subgroups), we assumed that the data were not normally distributed. All p-values were calculated by Wilcoxon rank sum tests only, but we are showing both median and mean RAs for illustrative purposes.

<sup>d</sup>None of the ANCOM-BC comparisons identified any taxa that were differentially relatively abundant between comparison groups.

<sup>e</sup>Relative abundances are presented as percentages of the number of reads of the taxon out of the total number of bacterial reads.

<sup>f</sup>The group of "other bacteria" contains skin bacteria, unresolved bacteria and minority taxa that could not be assigned to any of the other categories.

**Figure S4: Endometrial microbiota compositions by infertility causes.** The alpha diversity, beta diversity and relative abundances of bacterial taxa in endometrium of women with male factor infertility, unexplained infertility and other causes of infertility. **a.** Graphical visualisation of alpha diversity analysis comparing the infertility causes. Boxplots represent median alpha diversity by Chao1 index (upper row) and Inverse Simpson index (lower row) with interquartile range. **b.** Graphical visualisation of beta diversity analysis by principal component analysis (PCA), based on centered log-ratio (clr) transformation of the relative abundances of bacterial genera in the different groups of infertility causes. **c.** Heatmaps of the 20 most relatively abundant bacterial genera in the different groups of infertility causes. The heatmaps were generated with the phyloseq and microbiome packages in R studio (v4.1.0). For **d** and **e**, see next page.

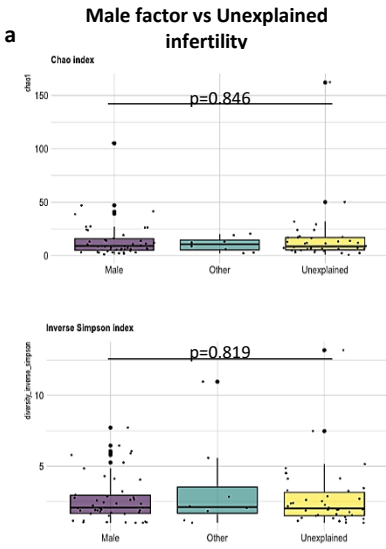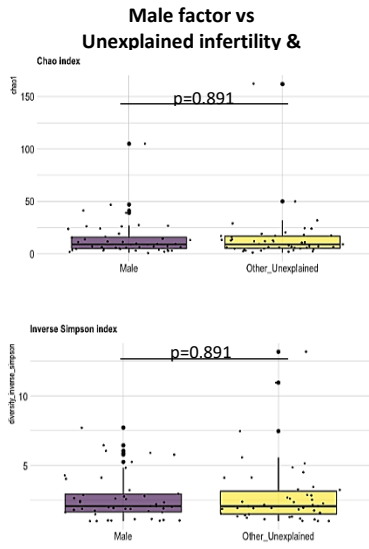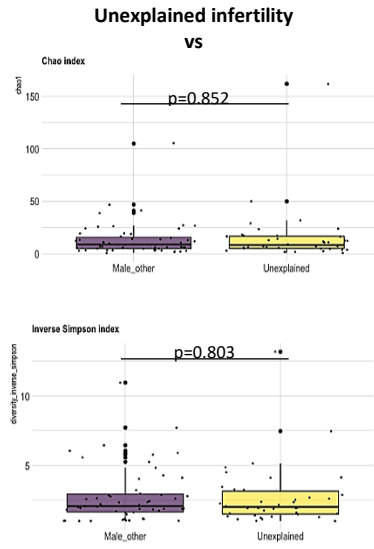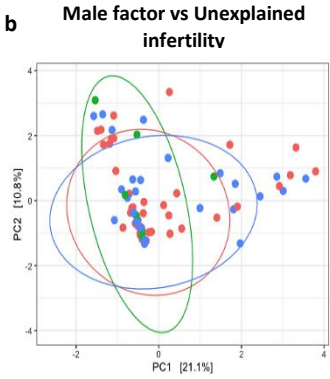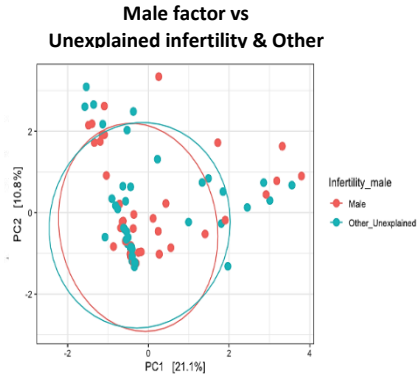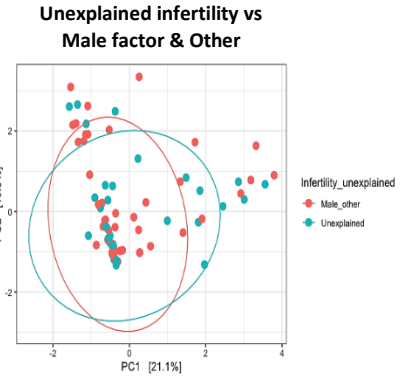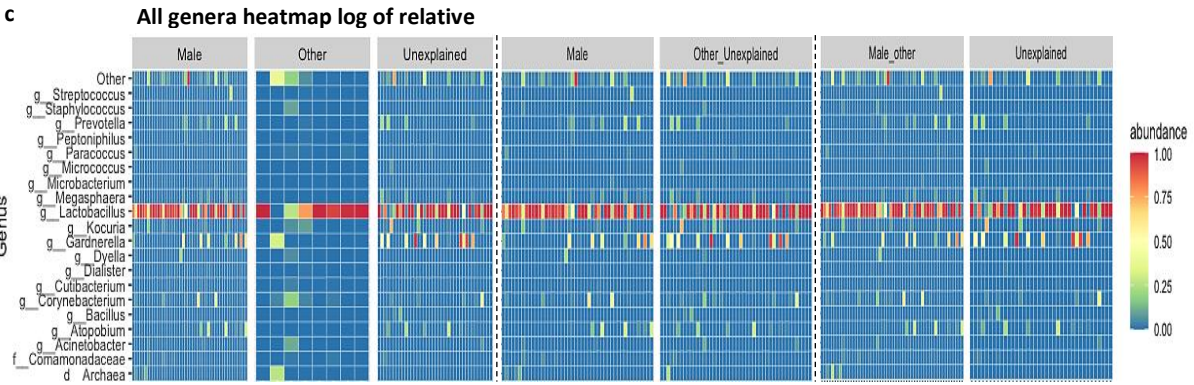

**Figure S4 (continued).** Stacked bar graphs of mean (d) and median (e) relative abundances of prespecified bacterial groups in the male factor infertility, unexplained infertility and other causes of infertility groups. BV, bacterial vaginosis; *G. vaginalis*, *Gardnerella vaginalis*; *L. crispatus*, *Lactobacillus crispatus*; *L. iners*, *Lactobacillus iners*.

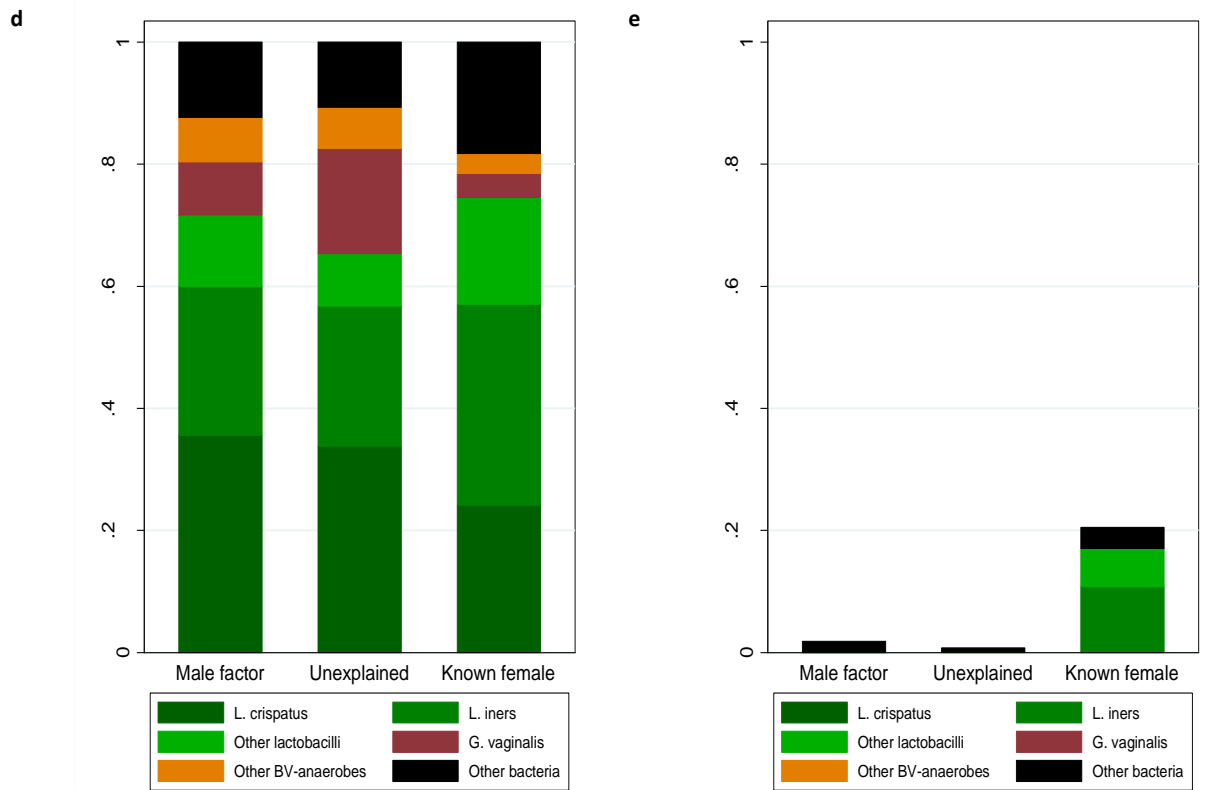

**Table S5. Participant characteristics by infertility type<sup>a</sup>**

|                                                           | Primary (n=52) <sup>b</sup> | Secondary (n=40) <sup>b</sup> | p-value <sup>c</sup> |
|-----------------------------------------------------------|-----------------------------|-------------------------------|----------------------|
| Median female age in yrs (IQR)                            | 33.4 (28.4-37.4)            | 36.8 (33.3-40.0)              | <b>0.001</b>         |
| Median female BMI in kg/m <sup>2</sup> (IQR) <sup>d</sup> | 23.2 (21.6-25.2)            | 24.1 (21.8-26.1)              | 0.237                |
| Median duration of infertility in months (IQR)            | 32.0 (24.0-48.8)            | 26.5 (21.3-37.5)              | 0.112                |
| Female smokers, n (%)                                     | 6 (11.5)                    | 2 (5.0)                       | 0.458                |
| Cause of infertility, n (%)                               |                             |                               | 0.224                |
| Male factor                                               | 30 (57.7)                   | 16 (40.0)                     |                      |
| Unexplained                                               | 19 (36.5)                   | 19 (47.5)                     |                      |
| Other <sup>e</sup>                                        | 3 (5.8)                     | 5 (12.5)                      |                      |
| Median # previous embryo transfers per participant (IQR)  | 1.0 (1.0-3.0)               | 2.0 (1.0-3.0)                 | 0.269                |
| Pregnancy outcome during follow-up, n (%)                 |                             |                               | 0.835                |
| Live birth                                                | 22 (42.3)                   | 16 (40.0)                     |                      |
| No live birth                                             | 30 (57.7)                   | 24 (60.0)                     |                      |

BMI, body mass index; IQR, interquartile range.

<sup>a</sup>Only samples with  $\geq 100$  16S rRNA sequencing reads (V1-V2 region) were included.

<sup>b</sup>Primary: female has never conceived before. Secondary: female has conceived before.

<sup>c</sup>Continuous variables were compared by Wilcoxon rank sum test and categorical variables by Fisher's exact test.

<sup>d</sup>Data was missing for one participant in the secondary infertility group.

<sup>e</sup>Other causes of infertility are tubal factor (secondary infertility: n=1), ovulatory disorder (primary infertility: n=1, secondary infertility: n=2), endometriosis (secondary infertility: n=1) and mixed causes (primary infertility: n=2; secondary infertility: n=1).



**Table S6. Endometrial microbiota characteristics by infertility type<sup>a</sup>**

|                                             | Primary (n=52) <sup>b</sup> | Secondary (n=40) <sup>b</sup> | p-value <sup>c</sup> |
|---------------------------------------------|-----------------------------|-------------------------------|----------------------|
| Alpha diversity                             |                             |                               |                      |
| Mean inverse Simpson diversity (SD)         | 2.90 (2.17)                 | 2.60 (1.95)                   | 0.503                |
| Mean Chao1 diversity (SD)                   | 15.37 (23.39)               | 13.33 (17.47)                 | 0.518                |
| Untargeted ANCOM-BC results <sup>c, d</sup> |                             |                               |                      |
| Mean RA <i>Gardnerella</i> genus (SD)       | 6.1 (±18.1)                 | 19.2 (±31.6)                  | <b>0.030</b>         |
| Targeted bacterial groups <sup>c, d</sup>   |                             |                               |                      |
| <i>Lactobacillus</i> genus                  |                             |                               | 0.328                |
| Median RA (IQR)                             | 95.2 (63.4-99.3)            | 85.3 (12.5-99.7)              |                      |
| 95% CI                                      | 80.1-98.6                   | 26.8-98.7                     |                      |
| Mean RA (SD)                                | 75.3 (35.0)                 | 61.6 (42.9)                   |                      |
| 95% CI                                      | 65.5-85.0                   | 47.9-75.3                     |                      |
| <i>L. crispatus</i>                         |                             |                               | <b>0.004</b>         |
| Median RA (IQR)                             | 35.0 (0-98.2)               | 0 (0-4.6)                     |                      |
| 95% CI                                      | 0-92.4                      | 0-0                           |                      |
| Mean RA (SD)                                | 45.5 (45.7)                 | 18.7 (35.8)                   |                      |
| 95% CI                                      | 32.8-58.2                   | 7.2-30.2                      |                      |
| <i>L. iners</i>                             |                             |                               | 0.808                |
| Median RA (IQR)                             | 0 (0-39.1)                  | 0 (0-58.2)                    |                      |
| 95% CI                                      | 0-5.5                       | 0-19.4                        |                      |
| Mean RA (SD)                                | 23.6 (36.6)                 | 25.8 (38.3)                   |                      |
| 95% CI                                      | 13.4-33.8                   | 13.5-38.0                     |                      |
| Other lactobacilli                          |                             |                               | 0.150                |
| Median RA (IQR)                             | 0 (0-2.4)                   | 0.6 (0-10.5)                  |                      |
| 95% CI                                      | 0-0.6                       | 0-5.2                         |                      |
| Mean RA (SD)                                | 6.2 (18.2)                  | 17.1 (32.6)                   |                      |
| 95% CI                                      | 1.1-11.3                    | 6.7-27.5                      |                      |
| <i>Gardnerella</i> genus                    |                             |                               | 0.051                |
| Median RA (IQR)                             | 0 (0-0)                     | 0 (0-34.6)                    |                      |
| 95% CI                                      | 0-0                         | 0-2.1                         |                      |
| Mean RA (SD)                                | 6.1 (18.1)                  | 19.2 (31.6)                   |                      |
| 95% CI                                      | 1.0-11.1                    | 9.1-29.3                      |                      |
| Other BV-anaerobes                          |                             |                               | 0.260                |
| Median RA (IQR)                             | 0 (0-0.2)                   | 0 (0-5.3)                     |                      |
| 95% CI                                      | 0-0.1                       | 0-1.8                         |                      |
| Mean RA (SD)                                | 5.8 (16.3)                  | 7.9 (15.7)                    |                      |
| 95% CI                                      | 1.3-10.3                    | 2.9-12.9                      |                      |
| Other bacteria (IQR) <sup>e</sup>           |                             |                               | 0.289                |
| Median RA (IQR)                             | 1.3 (0.1-16.3)              | 0.6 (0-10.0)                  |                      |
| 95% CI                                      | 0.6-4.7                     | 0.1-6.3                       |                      |
| Mean RA (SD)                                | 12.9 (23.0)                 | 11.4 (23.5)                   |                      |
| 95% CI                                      | 6.5-19.3                    | 3.9-18.9                      |                      |
| RA subgroups of bacterial groups            |                             |                               |                      |
| <i>Lactobacillus</i> genus RA, n (%)        |                             |                               | 0.241                |
| ≤10%                                        | 7 (13.5)                    | 10 (25.0)                     |                      |
| 11-89%                                      | 12 (23.1)                   | 11 (27.5)                     |                      |
| ≥90%                                        | 33 (63.5)                   | 19 (47.5)                     |                      |
| <i>L. crispatus</i> RA, n (%)               |                             |                               | <b>0.009</b>         |
| ≤10%                                        | 24 (46.2)                   | 30 (75.0)                     |                      |

|                                                     |           |           |              |
|-----------------------------------------------------|-----------|-----------|--------------|
| 11-89%                                              | 8 (15.4)  | 5 (12.5)  |              |
| ≥90%                                                | 20 (38.5) | 5 (12.5)  |              |
| <i>L. iners</i> RA, n (%)                           |           |           | 0.782        |
| ≤10%                                                | 35 (67.3) | 24 (60.0) |              |
| 11-89%                                              | 11 (21.2) | 10 (25.0) |              |
| ≥90%                                                | 6 (11.5)  | 6 (15.0)  |              |
| Other lactobacilli RA, n (%)                        |           |           | 0.102        |
| ≤10%                                                | 46 (88.5) | 29 (72.5) |              |
| 11-89%                                              | 5 (9.6)   | 7 (17.5)  |              |
| ≥90%                                                | 1 (1.9)   | 4 (10.0)  |              |
| >10% <i>Gardnerella</i> genus RA, n (%)             | 6 (11.5)  | 13 (32.5) | <b>0.019</b> |
| >10% Other BV-anaerobes RA, n (%)                   | 6 (11.5)  | 8 (20.0)  | 0.381        |
| >10% Other bacteria RA, n (%) <sup>e</sup>          | 14 (26.9) | 10 (25.0) | 1.000        |
| >10% Other BV-anaerobes or other bacteria RA, n (%) | 18 (34.6) | 16 (40.0) | 0.665        |

BV, bacterial vaginosis; CI, confidence interval; IQR, interquartile range; RA, relative abundance; SD, standard deviation.

<sup>a</sup>Only samples with ≥100 16S rRNA sequencing reads (V1-V2 region) were included.

<sup>b</sup>Primary: female has never conceived before. Secondary: female has conceived before.

<sup>c</sup>ANCOM-BC analyses were corrected for multiple testing and were used to identify individual taxa with significantly different RAs in comparison groups in an untargeted manner. In the targeted analyses (using prespecified bacterial groups and subgroups), we assumed that the data were not normally distributed. All p-values were calculated by Wilcoxon rank sum tests only, but we are showing both median and mean RAs for illustrative purposes.

<sup>d</sup>Relative abundances are presented as percentages of the number of reads of the taxon out of the total number of bacterial reads in each sample.

<sup>e</sup>The group of "other bacteria" contains skin bacteria, unresolved bacteria and minority taxa that could not be assigned to any of the other categories.

**Figure S5: Endometrial microbiota composition by infertility type.** Comparison of endometrial microbiota composition and diversity between the primary and secondary infertility groups. **a.** Graphical visualisation of alpha diversity analysis. Boxplots represent median alpha diversity by Chao1 index and Inverse Simpson index with interquartile range. **b.** Graphical visualisation of beta diversity analysis by principal component analysis (PCA), based on centered log-ratio (clr) transformation of the relative abundances of genera. **c.** Heatmap representing the 20 most relatively abundant bacterial genera. Each column represents a subject, whereas each row represents a genus. The heatmaps were generated with the phyloseq and microbiome packages in R studio (v4.1.0). For **d** and **e**, see next page.

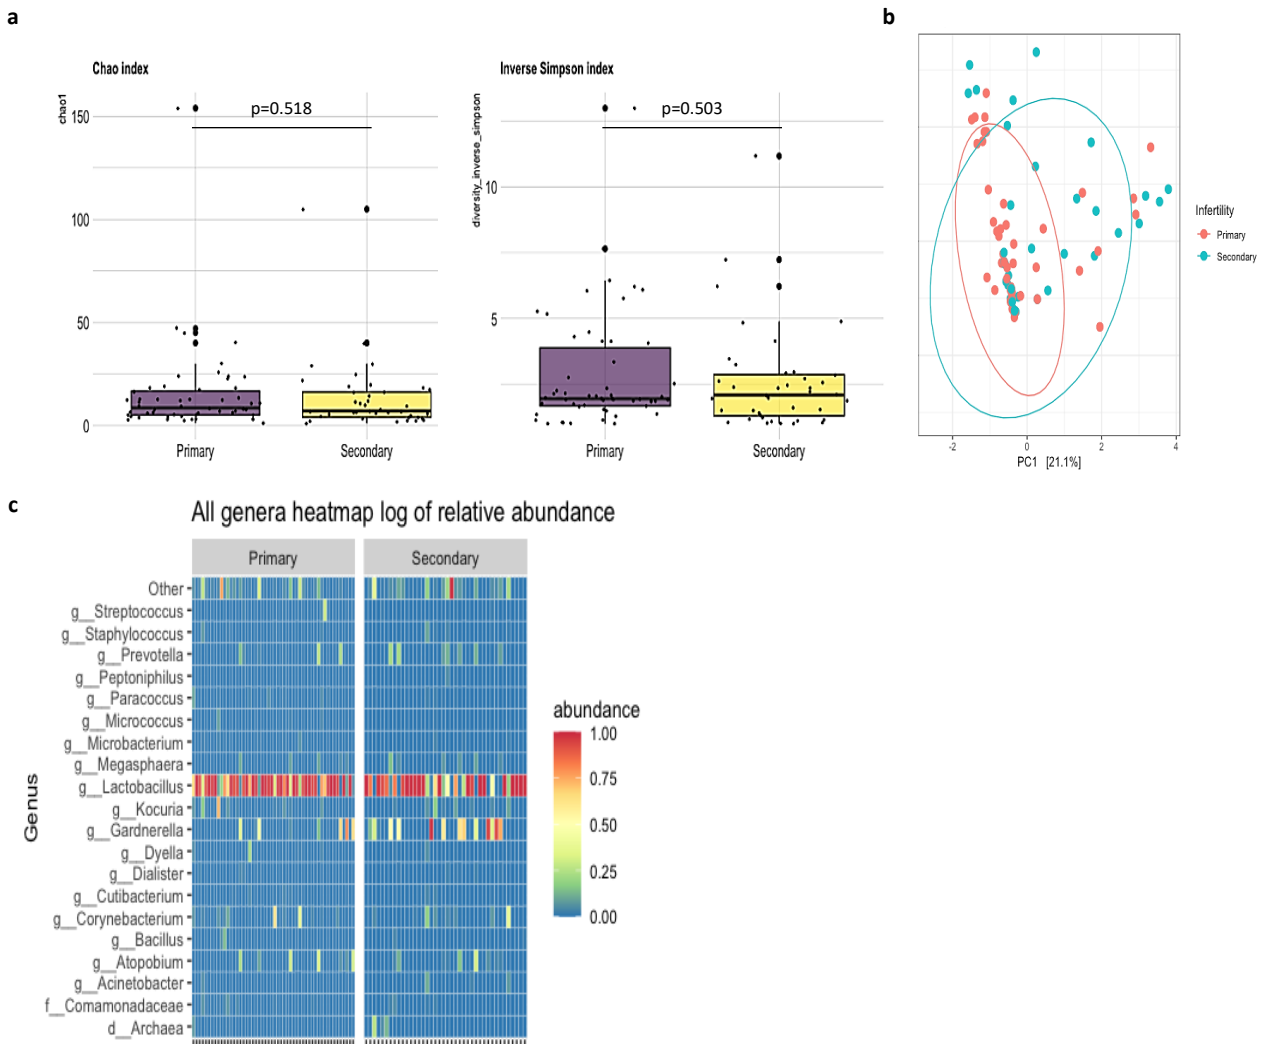

**Figure S5 (continued).** Stacked bar graphs of mean (**d**) and median (**e**) relative abundances of prespecified bacterial groups in the primary and secondary infertility groups. BV, bacterial vaginosis; *G. vaginalis*, *Gardnerella vaginalis*; *L. crispatus*, *Lactobacillus crispatus*; *L. iners*, *Lactobacillus iners*.

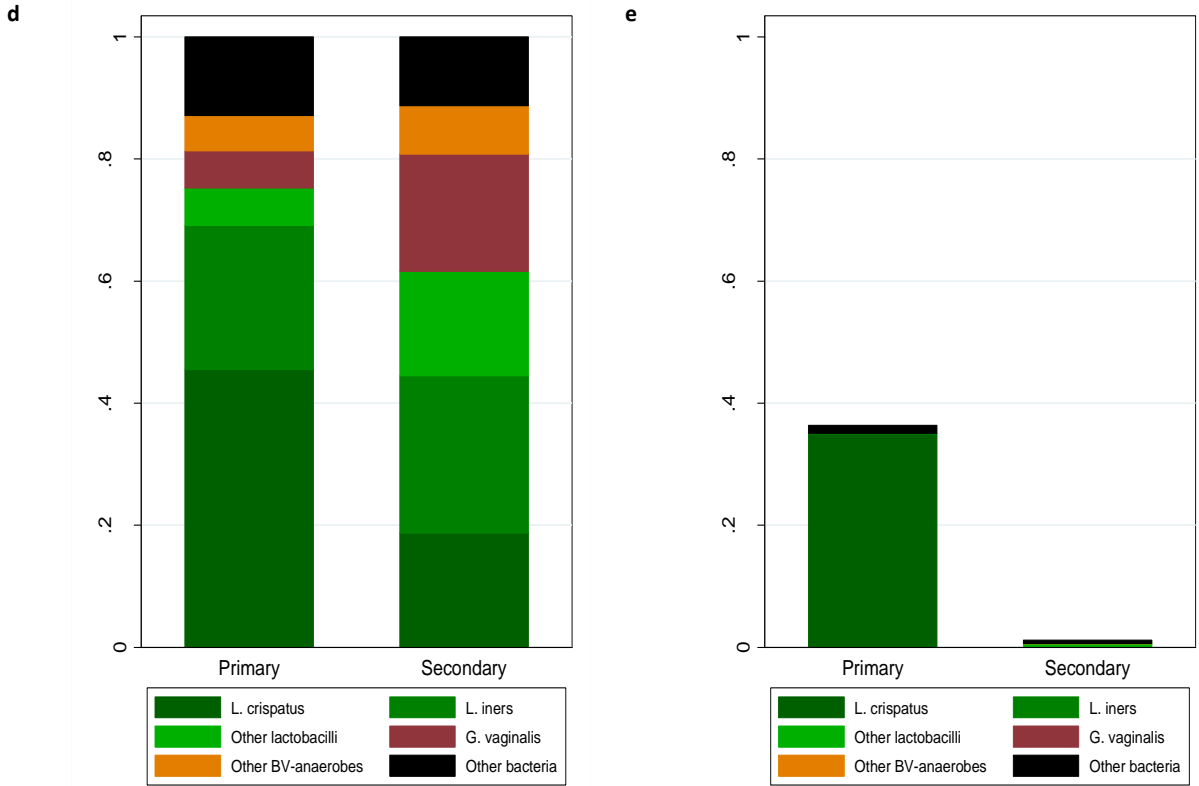

Supplement: 41598_2023_30591_MOESM1_ESM.pdf [file 41598_2023_30591_MOESM1_ESM.pdf]
